# Supplementary material
Source: PubMed Central journal article supplement (PMC1140409)

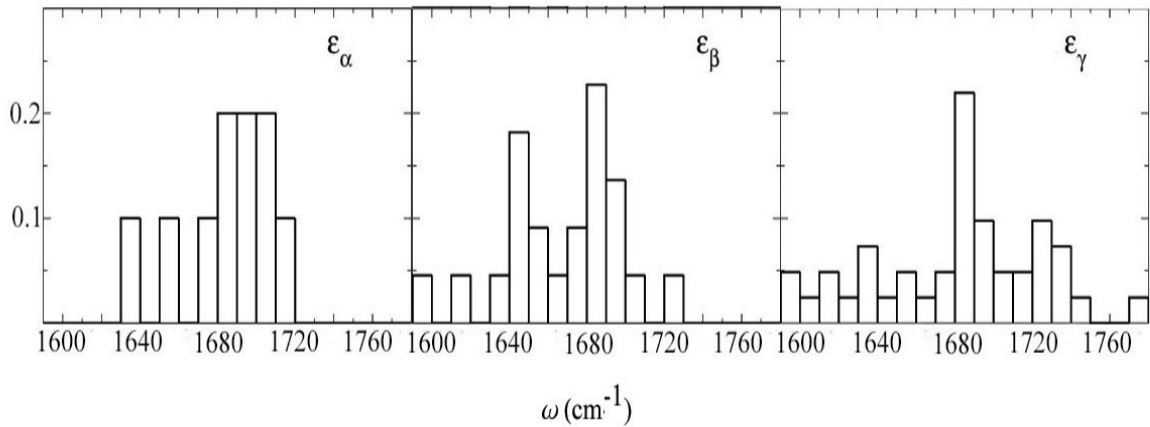

Supplement: pnas_0408781102_2.pdf [file pnas_0408781102_2.pdf]

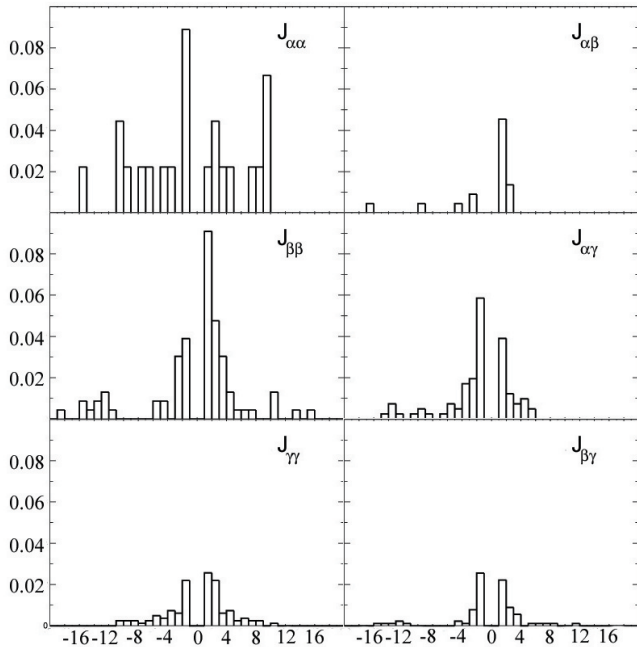

Supplement: pnas_0408781102_3.pdf [file pnas_0408781102_3.pdf]
